# Supplementary material for: Impact of the COVID-19 Pandemic on Patients with Parkinson’s Disease from the Perspective of Treating Physicians—A Nationwide Cross-Sectional Study
Source: MDPI journal article supplement (doi:10.3390/brainsci12030353), 2022-03-05
Supplement: s1 [file s1]

## Supplementary Material

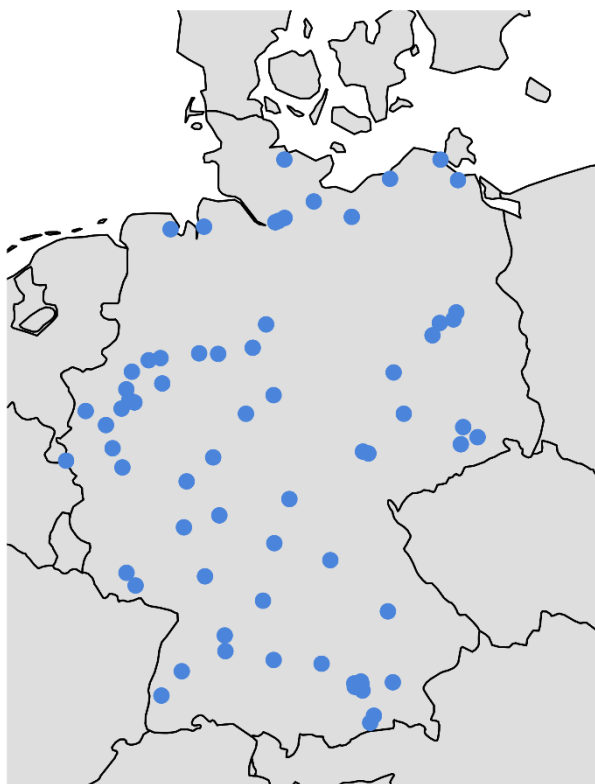

**Supplementary Figure S1:** Map of Germany displaying the location of all 67 healthcare facilities contacted for this study.

**Supplementary Table S1:** Complete survey results.

|                                                      |    |        |
|------------------------------------------------------|----|--------|
| 1. Please indicate which specialization you have.    |    |        |
| Neurologist                                          | 39 | 97.5%  |
| Internist                                            | 0  | 0.0%   |
| Physician in other specialty                         | 1  | 2.5%   |
| 2. I am a family physician/general practitioner.     |    |        |
| Yes                                                  | 0  | 0.0%   |
| No                                                   | 40 | 100.0% |
| 3. In which sector of patient care do you work?      |    |        |
| Private office                                       | 3  | 7.5%   |
| Rehabilitation clinic                                | 0  | 0.0%   |
| Hospital                                             | 30 | 75.0%  |
| Other: if so, please fill in                         | 7  | 17.5%  |
| Hospital and private office                          | 2  | 5.0%   |
| Hospital and outpatient department                   | 1  | 2.5%   |
| Outpatient department                                | 2  | 5.0%   |
| „Parkinson-center“                                   | 1  | 2.5%   |
| DBS outpatient department                            | 1  | 2.5%   |
| 4. Which statement best applies to you?              |    |        |
| I do NOT treat Parkinson's patients.                 | 0  | 0.0%   |
| I RARELY treat patients with Parkinson's disease.    | 2  | 5.0%   |
| I REGULARLY treat patients with Parkinson's disease. | 8  | 20.0%  |

|                                                                                                                                                                          |    |       |
|--------------------------------------------------------------------------------------------------------------------------------------------------------------------------|----|-------|
| Parkinson's patients are my MAIN FOCUS, but I treat other patients as well.                                                                                              | 29 | 72.5% |
| I EXCLUSIVELY treat Parkinson's patients.                                                                                                                                | 1  | 2.5%  |
| 5. If you compare what you do now to before the pandemic: How often did you treat Parkinson's patients?                                                                  |    |       |
| Less often                                                                                                                                                               | 17 | 42.5% |
| Equally often                                                                                                                                                            | 20 | 50.0% |
| More often                                                                                                                                                               | 3  | 7.5%  |
| 6. If you compare your activity now with the time before the pandemic: Did you have to cancel any of your patients' appointments due to the pandemic?                    |    |       |
| No                                                                                                                                                                       | 5  | 12.5% |
| Yes (few)                                                                                                                                                                | 20 | 50.0% |
| Yes (many)                                                                                                                                                               | 15 | 37.5% |
| Yes (all)                                                                                                                                                                | 0  | 0.0%  |
| 7. If you compare your work now with the time before the pandemic: Did patients cancel appointments of their own accord due to the pandemic?                             |    |       |
| No                                                                                                                                                                       | 1  | 2.5%  |
| Yes (few)                                                                                                                                                                | 25 | 62.5% |
| Yes (many)                                                                                                                                                               | 14 | 35.0% |
| Yes (all)                                                                                                                                                                | 0  | 0.0%  |
| 8. If you compare your work now with the time before the pandemic: Do you feel your patients received worse care during the pandemic?                                    |    |       |
| No                                                                                                                                                                       | 1  | 2.5%  |
| Yes (few)                                                                                                                                                                | 20 | 50.0% |
| Yes (many)                                                                                                                                                               | 19 | 47.5% |
| Yes (all)                                                                                                                                                                | 0  | 0.0%  |
| 9. If you compare your work now with the time before the pandemic: Do you have the feeling that the symptoms of your patients are getting worse because of the pandemic? |    |       |
| No                                                                                                                                                                       | 7  | 17.5% |
| Yes (for a few)                                                                                                                                                          | 24 | 60.0% |
| Yes (for many)                                                                                                                                                           | 9  | 22.5% |
| Yes (for all)                                                                                                                                                            | 0  | 0.0%  |
| 10. If you think of all your Parkinson's patients: Do you feel that the pandemic and associated changes resulted in a change in certain symptoms?                        |    |       |
| 10.1 Motor symptoms (rigor, tremor, bradykinesia, OFF-time, dyskinesia).                                                                                                 |    |       |
| Worsened for many                                                                                                                                                        | 5  | 12.5% |
| Worsened for some                                                                                                                                                        | 25 | 62.5% |
| Unchanged                                                                                                                                                                | 10 | 25.0% |
| Improved for some                                                                                                                                                        | 0  | 0.0%  |
| Improved for many                                                                                                                                                        | 0  | 0.0%  |
| 10.2 Neuropsychiatric symptoms (depression, anxiety, obsessive compulsive behaviour, hallucinations)                                                                     |    |       |
| Worsened for many                                                                                                                                                        | 11 | 27.5% |
| Worsened for some                                                                                                                                                        | 22 | 55.0% |

|                                                                                                     |    |       |
|-----------------------------------------------------------------------------------------------------|----|-------|
| Unchanged                                                                                           | 7  | 17.5% |
| Improved for some                                                                                   | 0  | 0.0%  |
| Improved for many                                                                                   | 0  | 0.0%  |
| 10.3 Autonomic symptoms (constipation, urinary incontinence, orthostatic dysregulation)             |    |       |
| Worsened for many                                                                                   | 0  | 0.0%  |
| Worsened for some                                                                                   | 9  | 23.7% |
| Unchanged                                                                                           | 29 | 76.3% |
| Improved for some                                                                                   | 0  | 0.0%  |
| Improved for many                                                                                   | 0  | 0.0%  |
| 10.4 Sleep disturbances                                                                             |    |       |
| Worsened for many                                                                                   | 2  | 5.3%  |
| Worsened for some                                                                                   | 25 | 65.8% |
| Unchanged                                                                                           | 11 | 28.9% |
| Improved for some                                                                                   | 0  | 0.0%  |
| Improved for many                                                                                   | 0  | 0.0%  |
| 11. Did you have problems organizing the following therapies for your patients during the pandemic? |    |       |
| 11.1 Rehabilitation measures                                                                        |    |       |
| No difficulties                                                                                     | 2  | 5.4%  |
| Rare difficulties                                                                                   | 14 | 37.8% |
| Frequent difficulties                                                                               | 21 | 56.8% |
| Impossible                                                                                          | 0  | 0.0%  |
| 11.2 Physiotherapy or occupational therapy                                                          |    |       |
| No difficulties                                                                                     | 3  | 7.5%  |
| Rare difficulties                                                                                   | 14 | 35.0% |
| Frequent difficulties                                                                               | 23 | 57.5% |
| Impossible                                                                                          | 0  | 0.0%  |
| 11.3 Speech therapy                                                                                 |    |       |
| No difficulties                                                                                     | 2  | 5.0%  |
| Rare difficulties                                                                                   | 13 | 32.5% |
| Frequent difficulties                                                                               | 25 | 62.5% |
| Impossible                                                                                          | 0  | 0.0%  |
| 11.4 Endoscopic intervention (e.g.: implantation of a jejunal probe)                                |    |       |
| No difficulties                                                                                     | 12 | 32.4% |
| Rare difficulties                                                                                   | 17 | 45.9% |
| Frequent difficulties                                                                               | 8  | 21.6% |
| Impossible                                                                                          | 0  | 0.0%  |
| 11.5 Deep brain stimulation (DBS) surgery                                                           |    |       |
| No difficulties                                                                                     | 11 | 28.9% |
| Rare difficulties                                                                                   | 11 | 28.9% |
| Frequent difficulties                                                                               | 15 | 39.5% |
| Impossible                                                                                          | 1  | 2.6%  |
| 11.6 Referrals to a hospital                                                                        |    |       |
| No difficulties                                                                                     | 6  | 16.2% |
| Rare difficulties                                                                                   | 22 | 59.5% |
| Frequent difficulties                                                                               | 9  | 24.3% |
| Impossible                                                                                          | 0  | 0.0%  |

|                                                                                     |    |       |
|-------------------------------------------------------------------------------------|----|-------|
| 12. Did you have to close your practice/department (partially) due to the pandemic? |    |       |
| No                                                                                  | 10 | 25.0% |
| Yes (partially)                                                                     | 28 | 70.0% |
| Yes (completely)                                                                    | 2  | 5.0%  |
| 13. Did you have to accept financial losses due to the pandemic?                    |    |       |
| None                                                                                | 18 | 48.6% |
| Minor                                                                               | 15 | 40.5% |
| Major                                                                               | 4  | 10.8% |
| 14. Did you have additional expenditures due to the pandemic?                       |    |       |
| None                                                                                | 25 | 65.8% |
| Minor                                                                               | 12 | 31.6% |
| Major                                                                               | 1  | 2.6%  |
| 15. Do hygiene concepts in your department/practice mean extra work for you?        |    |       |
| None                                                                                | 1  | 2.5%  |
| Minor                                                                               | 16 | 40.0% |
| Major                                                                               | 23 | 57.5% |
| 16.1 Have you expanded your services due to the pandemic?                           |    |       |
| Through increased home consultations                                                |    |       |
| Yes                                                                                 | 5  | 12.8% |
| No                                                                                  | 34 | 87.2% |
| 17.1 How were these services accepted by your PD patients?                          |    |       |
| Not accepted                                                                        | 0  | 0.0%  |
| Somewhat accepted                                                                   | 3  | 60.0% |
| Broadly accepted                                                                    | 2  | 40.0% |
| 16.2 Have you expanded your services due to the pandemic?                           |    |       |
| Through online offers / consultation hours                                          |    |       |
| Yes                                                                                 | 25 | 64.1% |
| No                                                                                  | 14 | 35.9% |
| 17.2 How were these services accepted by your PD patients?                          |    |       |
| Not accepted                                                                        | 1  | 4.0%  |
| Somewhat accepted                                                                   | 20 | 80.0% |
| Broadly accepted                                                                    | 4  | 16.0% |
| 16.3 Have you expanded your services due to the pandemic?                           |    |       |
| Through telephone consultations                                                     |    |       |
| Yes                                                                                 | 31 | 77.5% |
| No                                                                                  | 9  | 22.5% |
| 17.3 How were these services accepted by your PD patients?                          |    |       |
| Not accepted                                                                        | 0  | 0.0%  |
| Somewhat accepted                                                                   | 14 | 45.2% |
| Broadly accepted                                                                    | 17 | 54.8% |
| 16.4 Have you expanded your services due to the pandemic?                           |    |       |
| By providing written information to your patients                                   |    |       |
| Yes                                                                                 | 6  | 15.4% |
| No                                                                                  | 33 | 84.6% |
| 17.4 How were these services accepted by your PD patients?                          |    |       |
| Not accepted                                                                        | 0  | 0.0%  |
| Somewhat accepted                                                                   | 5  | 83.3% |
| Broadly accepted                                                                    | 1  | 16.7% |
| 16.5 Have you expanded your services due to the pandemic?                           |    |       |

|                                                                                                                           |    |        |
|---------------------------------------------------------------------------------------------------------------------------|----|--------|
| Through other measures                                                                                                    |    |        |
| Yes (Please name the measures: _____)                                                                                     | 3  | 7.5%   |
| Homepage, social media                                                                                                    | 1  | 2.5%   |
| Emergency consultation hour                                                                                               | 1  | 2.5%   |
| No                                                                                                                        | 37 | 92.5%  |
| 17.5 How were these services accepted by your PD patients?                                                                |    |        |
| Not accepted                                                                                                              | 0  | 0.0%   |
| Somewhat accepted                                                                                                         | 0  | 0.0%   |
| Broadly accepted                                                                                                          | 2  | 100.0% |
| 18. Have you treated/visited patients with COVID19 yourself?                                                              |    |        |
| No                                                                                                                        | 15 | 37.5%  |
| Yes                                                                                                                       | 25 | 62.5%  |
| 19. Do you feel that your health is at risk during your work?                                                             |    |        |
| No                                                                                                                        | 18 | 45.0%  |
| Yes                                                                                                                       | 22 | 55.0%  |
| 20. Do you feel protected by the protective measures available to you?                                                    |    |        |
| No                                                                                                                        | 0  | 0.0%   |
| Yes (somewhat protected)                                                                                                  | 17 | 42.5%  |
| Yes (very well protected)                                                                                                 | 23 | 57.5%  |
| 21. Did you find your work with PD patients more stressful/demanding during the pandemic compared to before the pandemic? |    |        |
| No                                                                                                                        | 24 | 60.0%  |
| Yes                                                                                                                       | 16 | 40.0%  |
| 22. Did your quality of care subjectively deteriorate?                                                                    |    |        |
| No                                                                                                                        | 25 | 62.5%  |
| Yes (slightly)                                                                                                            | 15 | 37.5%  |
| Yes (significantly)                                                                                                       | 0  | 0.0%   |
| 23. Have you been vaccinated against influenza?                                                                           |    |        |
| Yes                                                                                                                       | 33 | 82.5%  |
| No                                                                                                                        | 7  | 17.5%  |
| 24. If a vaccine against SARSCoV2 were available, would you get vaccinated?                                               |    |        |
| Yes                                                                                                                       | 39 | 97.5%  |
| No                                                                                                                        | 1  | 2.5%   |
| 25. Why would you not get vaccinated?                                                                                     |    |        |
| I don't think vaccinating is generally a good idea.                                                                       | 0  | 0.0%   |
| I do not think I could contract COVID-19.                                                                                 | 0  | 0.0%   |
| I do not trust a new vaccine yet.                                                                                         | 1  | 100.0% |
| I am afraid of side effects.                                                                                              | 0  | 0.0%   |
| Other reasons: _____                                                                                                      | 0  | 0.0%   |
| 26. Would you recommend that your Parkinson's patients get vaccinated?                                                    |    |        |
| Yes                                                                                                                       | 40 | 100.0% |
| No                                                                                                                        | 0  | 0.0%   |

**Supplementary Table S2:** Transcripts of the German and English version of the ParCoPa survey, physicians' part.

| German transcript of the ParCoPa survey<br>(physicians)                                                                                                 | English transcript of the ParCoPa survey<br>(physicians)                                                                                              |
|---------------------------------------------------------------------------------------------------------------------------------------------------------|-------------------------------------------------------------------------------------------------------------------------------------------------------|
| 1. Bitte geben Sie an, welche Spezialisierung Sie haben.                                                                                                | 1. Please indicate which specialization you have.                                                                                                     |
| Neurologin/Neurologe oder<br>Nervenarzt/ärztin                                                                                                          | Neurologist                                                                                                                                           |
| Internist/Internistin                                                                                                                                   | Internist                                                                                                                                             |
| Facharzt/ärztin für andere Fachrichtung                                                                                                                 | Physician in other specialty                                                                                                                          |
| 2. Ich bin Hausarzt/Hausärztin.                                                                                                                         | 2. I am a family physician/general practitioner.                                                                                                      |
| Ja                                                                                                                                                      | Yes                                                                                                                                                   |
| Nein                                                                                                                                                    | No                                                                                                                                                    |
| 3. In welchem Sektor der Patientenversorgung arbeiten Sie?                                                                                              | 3. In which sector of patient care do you work?                                                                                                       |
| Praxis                                                                                                                                                  | Private office                                                                                                                                        |
| Rehabilitationsklinik                                                                                                                                   | Rehabilitation clinic                                                                                                                                 |
| Akutkrankenhaus                                                                                                                                         | Hospital                                                                                                                                              |
| Sonstiges: dann bitte ausfüllen                                                                                                                         | Other: if so, please fill in                                                                                                                          |
| 4. Was trifft auf Sie am besten zu?                                                                                                                     | 4. Which statement best applies to you?                                                                                                               |
| Ich behandle KEINE Parkinsonpatienten.                                                                                                                  | I do NOT treat Parkinson's patients.                                                                                                                  |
| Ich behandle SELTEN Parkinsonpatienten.                                                                                                                 | I RARELY treat patients with Parkinson's disease.                                                                                                     |
| Ich behandle REGELMAESSIG Parkinsonpatienten.                                                                                                           | I REGULARLY treat patients with Parkinson's disease.                                                                                                  |
| Parkinsonpatienten sind mein SCHWERPUNKT, aber ich behandle auch andere Patienten.                                                                      | Parkinson's patients are my MAIN FOCUS, but I treat other patients as well.                                                                           |
| Ich behandle AUSSCHLIESSLICH Parkinsonpatienten                                                                                                         | I EXCLUSIVELY treat Parkinson's patients.                                                                                                             |
| 5. Wenn Sie Ihre Tätigkeit jetzt mit der Zeit VOR der Pandemie vergleichen: Wie oft haben Sie Parkinsonpatienten behandelt?                             | 5. If you compare what you do now to before the pandemic: How often did you treat Parkinson's patients?                                               |
| Seltener                                                                                                                                                | Less often                                                                                                                                            |
| Gleich oft                                                                                                                                              | Equally often                                                                                                                                         |
| Häufiger                                                                                                                                                | More often                                                                                                                                            |
| 6. Wenn Sie Ihre Tätigkeit jetzt mit der Zeit VOR der Pandemie vergleichen: Mussten Sie Termine Ihrer Patienten/innen auf Grund der Pandemie absagen?   | 6. If you compare your activity now with the time before the pandemic: Did you have to cancel any of your patients' appointments due to the pandemic? |
| Nein                                                                                                                                                    | No                                                                                                                                                    |
| Ja (wenige)                                                                                                                                             | Yes (few)                                                                                                                                             |
| Ja (viele)                                                                                                                                              | Yes (many)                                                                                                                                            |
| Ja (alle)                                                                                                                                               | Yes (all)                                                                                                                                             |
| 7. Wenn Sie Ihre Tätigkeit jetzt mit der Zeit VOR der Pandemie vergleichen: Haben Patienten/innen von sich aus auf Grund der Pandemie Termine abgesagt? | 7. If you compare your work now with the time before the pandemic: Did patients cancel appointments of their own accord due to the pandemic?          |

|             |            |
|-------------|------------|
| Nein        | No         |
| Ja (wenige) | Yes (few)  |
| Ja (viele)  | Yes (many) |
| Ja (alle)   | Yes (all)  |

  

|                                                                                                                                                                      |                                                                                                                                       |
|----------------------------------------------------------------------------------------------------------------------------------------------------------------------|---------------------------------------------------------------------------------------------------------------------------------------|
| 8. Wenn Sie Ihre Tätigkeit jetzt mit der Zeit VOR der Pandemie vergleichen: Haben Sie das Gefühl Ihre Patienten/innen sind während der Pandemie schlechter versorgt? | 8. If you compare your work now with the time before the pandemic: Do you feel your patients received worse care during the pandemic? |
| Nein                                                                                                                                                                 | No                                                                                                                                    |
| Ja (wenige)                                                                                                                                                          | Yes (few)                                                                                                                             |
| Ja (viele)                                                                                                                                                           | Yes (many)                                                                                                                            |
| Ja (alle)                                                                                                                                                            | Yes (all)                                                                                                                             |

  

|                                                                                                                                                                                 |                                                                                                                                                                          |
|---------------------------------------------------------------------------------------------------------------------------------------------------------------------------------|--------------------------------------------------------------------------------------------------------------------------------------------------------------------------|
| 9. Wenn Sie Ihre Tätigkeit jetzt mit der Zeit VOR der Pandemie vergleichen: Haben Sie das Gefühl die Symptomatik Ihrer Patienten/innen verschlechterte sich wegen der Pandemie? | 9. If you compare your work now with the time before the pandemic: Do you have the feeling that the symptoms of your patients are getting worse because of the pandemic? |
| Nein                                                                                                                                                                            | No                                                                                                                                                                       |
| Ja (bei wenigen)                                                                                                                                                                | Yes (for a few)                                                                                                                                                          |
| Ja (bei vielen)                                                                                                                                                                 | Yes (for many)                                                                                                                                                           |
| Ja (bei allen)                                                                                                                                                                  | Yes (for all)                                                                                                                                                            |

  

|                                                                                                                                                                                                         |                                                                                                                                                   |
|---------------------------------------------------------------------------------------------------------------------------------------------------------------------------------------------------------|---------------------------------------------------------------------------------------------------------------------------------------------------|
| 10. Wenn Sie sich ein Bild über alle Ihre Parkinsonpatienten machen: Haben Sie den Eindruck, dass die Pandemie und die damit verbundenen Veränderungen zu einer Veränderung bestimmter Symptome führte? | 10. If you think of all your Parkinson's patients: Do you feel that the pandemic and associated changes resulted in a change in certain symptoms? |
| 10.1 Motorische Symptome (Rigor, Tremor, Bradykinese, OFF-Zeit, Dyskinesien)                                                                                                                            | 10.1 Motor symptoms (rigor, tremor, bradykinesia, OFF-time, dyskinesia).                                                                          |
| Bei vielen verschlechtert                                                                                                                                                                               | Worsened for many                                                                                                                                 |
| Bei einigen verschlechtert                                                                                                                                                                              | Worsened for some                                                                                                                                 |
| Nicht verändert                                                                                                                                                                                         | Unchanged                                                                                                                                         |
| Bei einigen gebessert                                                                                                                                                                                   | Improved for some                                                                                                                                 |
| Bei vielen gebessert                                                                                                                                                                                    | Improved for many                                                                                                                                 |
| 10.2 Neuropsychiatrische Symptome (Depressivität, Angst, Zwangsverhalten, Halluzinationen)                                                                                                              | 10.2 Neuropsychiatric symptoms (depression, anxiety, obsessive compulsive behaviour, hallucinations)                                              |
| Bei vielen verschlechtert                                                                                                                                                                               | Worsened for many                                                                                                                                 |
| Bei einigen verschlechtert                                                                                                                                                                              | Worsened for some                                                                                                                                 |
| Nicht verändert                                                                                                                                                                                         | Unchanged                                                                                                                                         |
| Bei einigen gebessert                                                                                                                                                                                   | Improved for some                                                                                                                                 |
| Bei vielen gebessert                                                                                                                                                                                    | Improved for many                                                                                                                                 |
| 10.3 Autonome Symptome (Obstipation, Urininkontinenz, orthostatische Dysregulation)                                                                                                                     | 10.3 Autonomic symptoms (constipation, urinary incontinence, orthostatic dysregulation)                                                           |
| Bei vielen verschlechtert                                                                                                                                                                               | Worsened for many                                                                                                                                 |
| Bei einigen verschlechtert                                                                                                                                                                              | Worsened for some                                                                                                                                 |
| Nicht verändert                                                                                                                                                                                         | Unchanged                                                                                                                                         |
| Bei einigen gebessert                                                                                                                                                                                   | Improved for some                                                                                                                                 |
| Bei vielen gebessert                                                                                                                                                                                    | Improved for many                                                                                                                                 |
| 10.4 Schlafstörungen                                                                                                                                                                                    | 10.4 Sleep disturbances                                                                                                                           |
| Bei vielen verschlechtert                                                                                                                                                                               | Worsened for many                                                                                                                                 |
| Bei einigen verschlechtert                                                                                                                                                                              | Worsened for some                                                                                                                                 |

|                                                                                                            |                                                                                                     |
|------------------------------------------------------------------------------------------------------------|-----------------------------------------------------------------------------------------------------|
| Nicht verändert                                                                                            | Unchanged                                                                                           |
| Bei einigen gebessert                                                                                      | Improved for some                                                                                   |
| Bei vielen gebessert                                                                                       | Improved for many                                                                                   |
| 11. Hatten Sie Probleme, während der Pandemie folgende Therapien für Ihre Patienten/innen zu organisieren? | 11. Did you have problems organizing the following therapies for your patients during the pandemic? |
| 11.1 Rehabilitative Maßnahmen                                                                              | 11.1 Rehabilitation measures                                                                        |
| Keine Probleme                                                                                             | No difficulties                                                                                     |
| Selten Probleme                                                                                            | Rare difficulties                                                                                   |
| Oft Probleme                                                                                               | Frequent difficulties                                                                               |
| Unmöglich                                                                                                  | Impossible                                                                                          |
| 11.2 Physio/Ergotherapie                                                                                   | 11.2 Physiotherapy or occupational therapy                                                          |
| Keine Probleme                                                                                             | No difficulties                                                                                     |
| Selten Probleme                                                                                            | Rare difficulties                                                                                   |
| Oft Probleme                                                                                               | Frequent difficulties                                                                               |
| Unmöglich                                                                                                  | Impossible                                                                                          |
| 11.3 Logopädie                                                                                             | 11.3 Speech therapy                                                                                 |
| Keine Probleme                                                                                             | No difficulties                                                                                     |
| Selten Probleme                                                                                            | Rare difficulties                                                                                   |
| Oft Probleme                                                                                               | Frequent difficulties                                                                               |
| Unmöglich                                                                                                  | Impossible                                                                                          |
| 11.4 Endoskopische Untersuchungen (z.B.: Implantation einer Jejunalsonde)                                  | 11.4 Endoscopic intervention (e.g.: implantation of a jejunal probe)                                |
| Keine Probleme                                                                                             | No difficulties                                                                                     |
| Selten Probleme                                                                                            | Rare difficulties                                                                                   |
| Oft Probleme                                                                                               | Frequent difficulties                                                                               |
| Unmöglich                                                                                                  | Impossible                                                                                          |
| 11.5 DBS-Operation (Tiefe Hirnstimulation)                                                                 | 11.5 DBS surgery (Deep Brain Stimulation)                                                           |
| Keine Probleme                                                                                             | No difficulties                                                                                     |
| Selten Probleme                                                                                            | Rare difficulties                                                                                   |
| Oft Probleme                                                                                               | Frequent difficulties                                                                               |
| Unmöglich                                                                                                  | Impossible                                                                                          |
| 11.6 Krankenhauseinweisung                                                                                 | 11.6 Referrals to a hospital                                                                        |
| Keine Probleme                                                                                             | No difficulties                                                                                     |
| Selten Probleme                                                                                            | Rare difficulties                                                                                   |
| Oft Probleme                                                                                               | Frequent difficulties                                                                               |
| Unmöglich                                                                                                  | Impossible                                                                                          |
| 12. Mussten Sie Ihre Praxis/Abteilung (teilweise) durch die Pandemie schließen?                            | 12. Did you have to close your practice/department (partially) due to the pandemic?                 |
| Nein                                                                                                       | No                                                                                                  |
| Ja (teilweise)                                                                                             | Yes (partially)                                                                                     |
| Ja (komplett)                                                                                              | Yes (completely)                                                                                    |
| 13. Mussten Sie auf Grund der Pandemie finanzielle Einbußen hinnehmen?                                     | 13. Did you have to accept financial losses due to the pandemic?                                    |
| Keine                                                                                                      | None                                                                                                |
| Geringere                                                                                                  | Minor                                                                                               |
| Deutliche                                                                                                  | Major                                                                                               |
| 14. Mussten Sie auf Grund der Pandemie Investitionen tätigen?                                              | 14. Did you have additional expenditures due to the pandemic?                                       |



|                                                                            |                                                                              |
|----------------------------------------------------------------------------|------------------------------------------------------------------------------|
| Keine                                                                      | None                                                                         |
| Geringere                                                                  | Minor                                                                        |
| Deutliche                                                                  | Major                                                                        |
| 15. Bedeuten Hygienekonzepte in Ihrer Abteilung/Praxis Mehrarbeit für Sie? | 15. Do hygiene concepts in your department/practice mean extra work for you? |
| Keine                                                                      | None                                                                         |
| Geringere                                                                  | Minor                                                                        |
| Deutliche                                                                  | Major                                                                        |
| 16.1 Haben Sie Ihr Angebot aufgrund der Pandemie erweitert?                | 16.1 Have you expanded your services due to the pandemic?                    |
| Durch vermehrte häusliche Konsultationen                                   | Through increased home consultations                                         |
| Ja                                                                         | Yes                                                                          |
| Nein                                                                       | No                                                                           |
| 17.1 Wie wurden diese Angebote von Ihren Parkinsonpatienten genutzt?       | 17.1 How were these services accepted by your PD patients?                   |
| Nicht genutzt                                                              | Not accepted                                                                 |
| Wenig genutzt                                                              | Somewhat accepted                                                            |
| Viel genutzt                                                               | Broadly accepted                                                             |
| 16.2 Haben Sie Ihr Angebot aufgrund der Pandemie erweitert?                | 16.2 Have you expanded your services due to the pandemic?                    |
| Durch Onlineangebote/Sprechstunden                                         | Through online offers / consultation hours                                   |
| Ja                                                                         | Yes                                                                          |
| Nein                                                                       | No                                                                           |
| 17.2 Wie wurden diese Angebote von Ihren Parkinsonpatienten genutzt?       | 17.2 How were these services accepted by your PD patients?                   |
| Nicht genutzt                                                              | Not accepted                                                                 |
| Wenig genutzt                                                              | Somewhat accepted                                                            |
| Viel genutzt                                                               | Broadly accepted                                                             |
| 16.3 Haben Sie Ihr Angebot aufgrund der Pandemie erweitert?                | 16.3 Have you expanded your services due to the pandemic?                    |
| Durch telefonische Sprechstunden                                           | Through telephone consultations                                              |
| Ja                                                                         | Yes                                                                          |
| Nein                                                                       | No                                                                           |
| 17.3 Wie wurden diese Angebote von Ihren Parkinsonpatienten genutzt?       | 17.3 How were these services accepted by your PD patients?                   |
| Nicht genutzt                                                              | Not accepted                                                                 |
| Wenig genutzt                                                              | Somewhat accepted                                                            |
| Viel genutzt                                                               | Broadly accepted                                                             |
| 16.4 Haben Sie Ihr Angebot aufgrund der Pandemie erweitert?                | 16.4 Have you expanded your services due to the pandemic?                    |
| Durch schriftliche Informationen für Ihre Patienten/innen                  | By providing written information to your patients                            |
| Ja                                                                         | Yes                                                                          |
| Nein                                                                       | No                                                                           |
| 17.4 Wie wurden diese Angebote von Ihren Parkinsonpatienten genutzt?       | 17.4 How were these services accepted by your PD patients?                   |
| Nicht genutzt                                                              | Not accepted                                                                 |
| Wenig genutzt                                                              | Somewhat accepted                                                            |
| Viel genutzt                                                               | Broadly accepted                                                             |
| 16.5 Haben Sie Ihr Angebot aufgrund der Pandemie erweitert?                | 16.5 Have you expanded your services due to the pandemic?                    |

|                                                                                                                                                      |                                                                                                                           |
|------------------------------------------------------------------------------------------------------------------------------------------------------|---------------------------------------------------------------------------------------------------------------------------|
| Durch andere Maßnahmen                                                                                                                               | Through other measures                                                                                                    |
| Ja (Bitte benennen Sie die Maßnahmen: _____)                                                                                                         | Yes (Please name the measures: _____)                                                                                     |
| Nein                                                                                                                                                 | No                                                                                                                        |
| 17.5 Wie wurden diese Angebote von Ihren Parkinsonpatienten genutzt?                                                                                 | 17.5 How were these services accepted by your PD patients?                                                                |
| Nicht genutzt                                                                                                                                        | Not accepted                                                                                                              |
| Wenig genutzt                                                                                                                                        | Somewhat accepted                                                                                                         |
| Viel genutzt                                                                                                                                         | Broadly accepted                                                                                                          |
| 18. Haben Sie selbst an COVID19 Erkrankte behandelt/visitiert?                                                                                       | 18. Have you treated/visited patients with COVID19 yourself?                                                              |
| Nein                                                                                                                                                 | No                                                                                                                        |
| Ja                                                                                                                                                   | Yes                                                                                                                       |
| 19. Fühlen Sie sich gesundheitlich gefährdet während Ihrer Arbeit?                                                                                   | 19. Do you feel that your health is at risk during your work?                                                             |
| Nein                                                                                                                                                 | No                                                                                                                        |
| Ja                                                                                                                                                   | Yes                                                                                                                       |
| 20. Fühlen Sie sich durch die Ihnen zur Verfügung stehenden Schutzmaßnahmen geschützt?                                                               | 20. Do you feel protected by the protective measures available to you?                                                    |
| Nein                                                                                                                                                 | No                                                                                                                        |
| Ja (ein wenig geschützt)                                                                                                                             | Yes (somewhat protected)                                                                                                  |
| Ja (sehr gut geschützt)                                                                                                                              | Yes (very well protected)                                                                                                 |
| 21. Haben Sie Ihre Arbeit mit Parkinsonpatienten während der Pandemie als stressiger/fordernder im Vergleich zu der Zeit vor der Pandemie empfunden? | 21. Did you find your work with PD patients more stressful/demanding during the pandemic compared to before the pandemic? |
| Nein                                                                                                                                                 | No                                                                                                                        |
| Ja                                                                                                                                                   | Yes                                                                                                                       |
| 22. Hat sich Ihre Behandlungsqualität subjektiv verschlechtert?                                                                                      | 22. Did your quality of care subjectively deteriorate?                                                                    |
| Nein                                                                                                                                                 | No                                                                                                                        |
| Ja (ein wenig)                                                                                                                                       | Yes (slightly)                                                                                                            |
| Ja (deutlich)                                                                                                                                        | Yes (significantly)                                                                                                       |
| 23. Sind Sie gegen Influenza geimpft?                                                                                                                | 23. Have you been vaccinated against influenza?                                                                           |
| Ja                                                                                                                                                   | Yes                                                                                                                       |
| Nein                                                                                                                                                 | No                                                                                                                        |
| 24. Würden Sie sich, sollte ein Impfstoff gegen SARSCoV2 verfügbar sein, impfen lassen?                                                              | 24. If a vaccine against SARSCoV2 were available, would you get vaccinated?                                               |
| Ja                                                                                                                                                   | Yes                                                                                                                       |
| Nein                                                                                                                                                 | No                                                                                                                        |
| 25. Warum würden Sie sich nicht impfen lassen?                                                                                                       | 25. Why would you not get vaccinated?                                                                                     |
| Ich finde impfen generell nicht sinnvoll                                                                                                             | I don't think vaccinating is generally a good idea.                                                                       |
| Ich denke nicht, dass ich mich an COVID-19 anstecken könnte.                                                                                         | I do not think I could contract COVID-19.                                                                                 |
| Ich vertraue einem neuen Impfstoff noch nicht.                                                                                                       | I do not trust a new vaccine yet.                                                                                         |

|                                                                           |                                                                        |
|---------------------------------------------------------------------------|------------------------------------------------------------------------|
| Ich habe Angst vor Nebenwirkungen.                                        | I am afraid of side effects.                                           |
| Andere Gründe: _____                                                      | Other reasons: _____                                                   |
| 26. Würden Sie Ihren Parkinsonpatienten empfehlen, sich impfen zu lassen? | 26. Would you recommend that your Parkinson's patients get vaccinated? |
| Ja                                                                        | Yes                                                                    |
| Nein                                                                      | No                                                                     |

Supplementary Table S3

### Checklist for Reporting Of Survey Studies (CROSS)

| Section/topic             | Item | Item description                                                                                                                                                                                                                                                                                                                                                  | Reported on page # |
|---------------------------|------|-------------------------------------------------------------------------------------------------------------------------------------------------------------------------------------------------------------------------------------------------------------------------------------------------------------------------------------------------------------------|--------------------|
| <b>Title and abstract</b> |      |                                                                                                                                                                                                                                                                                                                                                                   |                    |
| Title and abstract        | 1a   | State the word “survey” along with a commonly used term in title or abstract to introduce the study’s design.                                                                                                                                                                                                                                                     | Abstract           |
|                           | 1b   | Provide an informative summary in the abstract, covering background, objectives, methods, findings/results, interpretation/discussion, and conclusions.                                                                                                                                                                                                           | Abstract           |
| <b>Introduction</b>       |      |                                                                                                                                                                                                                                                                                                                                                                   |                    |
| Background                | 2    | Provide a background about the rationale of study, what has been previously done, and why this survey is needed.                                                                                                                                                                                                                                                  | Page 1             |
| Purpose/aim               | 3    | Identify specific purposes, aims, goals, or objectives of the study.                                                                                                                                                                                                                                                                                              | Page 2             |
| <b>Methods</b>            |      |                                                                                                                                                                                                                                                                                                                                                                   |                    |
| Study design              | 4    | Specify the study design in the methods section with a commonly used term (e.g., cross-sectional or longitudinal).                                                                                                                                                                                                                                                | Page 2             |
| Data collection methods   | 5a   | Describe the questionnaire (e.g., number of sections, number of questions, number and names of instruments used).                                                                                                                                                                                                                                                 | Page 2             |
|                           | 5b   | Describe all questionnaire instruments that were used in the survey to measure particular concepts. Report target population, reported validity and reliability information, scoring/classification procedure, and reference links (if any).                                                                                                                      | Page 2             |
|                           | 5c   | Provide information on pretesting of the questionnaire, if performed (in the article or in an online supplement). Report the method of pretesting, number of times questionnaire was pre-tested, number and demographics of participants used for pretesting, and the level of similarity of demographics between pre-testing participants and sample population. | Page 2             |
|                           | 5d   | Questionnaire if possible, should be fully provided (in the article, or as appendices or as an online supplement).                                                                                                                                                                                                                                                | Supplements        |
| Sample characteristics    | 6a   | Describe the study population (i.e., background, locations, eligibility criteria for participant inclusion in survey, exclusion criteria).                                                                                                                                                                                                                        | Page 2             |

|                        |     |                                                                                                                                                                                                                                                                                       |        |
|------------------------|-----|---------------------------------------------------------------------------------------------------------------------------------------------------------------------------------------------------------------------------------------------------------------------------------------|--------|
|                        | 6b  | Describe the sampling techniques used (e.g., single stage or multistage sampling, simple random sampling, stratified sampling, cluster sampling, convenience sampling). Specify the locations of sample participants whenever clustered sampling was applied.                         | NA     |
|                        | 6c  | Provide information on sample size, along with details of sample size calculation.                                                                                                                                                                                                    | Page 3 |
|                        | 6d  | Describe how representative the sample is of the study population (or target population if possible), particularly for population-based surveys.                                                                                                                                      | Page 3 |
|                        | 7a  | Provide information on modes of questionnaire administration, including the type and number of contacts, the location where the survey was conducted (e.g., outpatient room or by use of online tools, such as SurveyMonkey).                                                         | Page 2 |
| Survey administration  | 7b  | Provide information of survey's time frame, such as periods of recruitment, exposure, and follow-up days.                                                                                                                                                                             | Page 2 |
|                        |     | Provide information on the entry process:                                                                                                                                                                                                                                             | Page 2 |
|                        | 7c  | →For non-web-based surveys, provide approaches to minimize human error in data entry.                                                                                                                                                                                                 |        |
|                        |     | →For web-based surveys, provide approaches to prevent “multiple participation” of participants.                                                                                                                                                                                       |        |
| Study preparation      | 8   | Describe any preparation process before conducting the survey (e.g., interviewers' training process, advertising the survey).                                                                                                                                                         | Page 2 |
| Ethical considerations | 9a  | Provide information on ethical approval for the survey if obtained, including informed consent, institutional review board [IRB] approval, Helsinki declaration, and good clinical practice [GCP] declaration (as appropriate).                                                       | Page 2 |
|                        | 9b  | Provide information about survey anonymity and confidentiality and describe what mechanisms were used to protect unauthorized access.                                                                                                                                                 | Page 2 |
|                        | 10a | Describe statistical methods and analytical approach. Report the statistical software that was used for data analysis.                                                                                                                                                                | Page 2 |
|                        | 10b | Report any modification of variables used in the analysis, along with reference (if available).                                                                                                                                                                                       | Page 2 |
| Statistical analysis   | 10c | Report details about how missing data was handled. Include rate of missing items, missing data mechanism (i.e., missing completely at random [MCAR], missing at random [MAR] or missing not at random [MNAR]) and methods used to deal with missing data (e.g., multiple imputation). | Page 2 |
|                        | 10d | State how non-response error was addressed.                                                                                                                                                                                                                                           | NA     |
|                        | 10e | For longitudinal surveys, state how loss to follow-up was addressed.                                                                                                                                                                                                                  | NA     |
|                        | 10f | Indicate whether any methods such as weighting of items or propensity scores have been used to adjust for non-representativeness of the sample.                                                                                                                                       | NA     |
|                        | 10g | Describe any sensitivity analysis conducted.                                                                                                                                                                                                                                          | NA     |

---

| <b>Results</b>             |     |                                                                                                                                                                                                                                 |        |
|----------------------------|-----|---------------------------------------------------------------------------------------------------------------------------------------------------------------------------------------------------------------------------------|--------|
| Respondent characteristics | 11a | Report numbers of individuals at each stage of the study. Consider using a flow diagram, if possible.                                                                                                                           | Page 3 |
|                            | 11b | Provide reasons for non-participation at each stage, if possible.                                                                                                                                                               | NA     |
|                            | 11c | Report response rate, present the definition of response rate or the formula used to calculate response rate.                                                                                                                   | Page 1 |
|                            | 11d | Provide information to define how unique visitors are determined. Report number of unique visitors along with relevant proportions (e.g., view proportion, participation proportion, completion proportion).                    | NA     |
| Descriptive results        | 12  | Provide characteristics of study participants, as well as information on potential confounders and assessed outcomes.                                                                                                           | Page 2 |
| Main findings              | 13a | Give unadjusted estimates and, if applicable, confounder-adjusted estimates along with 95% confidence intervals and p-values.                                                                                                   | Page 3 |
|                            | 13b | For multivariable analysis, provide information on the model building process, model fit statistics, and model assumptions (as appropriate).                                                                                    | Page 2 |
|                            | 13c | Provide details about any sensitivity analysis performed. If there are considerable amount of missing data, report sensitivity analyses comparing the results of complete cases with that of the imputed dataset (if possible). | NA     |
| <b>Discussion</b>          |     |                                                                                                                                                                                                                                 |        |
| Limitations                | 14  | Discuss the limitations of the study, considering sources of potential biases and imprecisions, such as non-representativeness of sample, study design, important uncontrolled confounders.                                     | Page 6 |
| Interpretations            | 15  | Give a cautious overall interpretation of results, based on potential biases and imprecisions and suggest areas for future research.                                                                                            | Page 6 |
| Generalizability           | 16  | Discuss the external validity of the results.                                                                                                                                                                                   | Page 6 |
| <b>Other sections</b>      |     |                                                                                                                                                                                                                                 |        |
| Role of funding source     | 17  | State whether any funding organization has had any roles in the survey's design, implementation, and analysis.                                                                                                                  | Page 7 |
| Conflict of interest       | 18  | Declare any potential conflict of interest.                                                                                                                                                                                     | Page 7 |
| Acknowledgements           | 19  | Provide names of organizations/persons that are acknowledged along with their contribution to the research.                                                                                                                     | Page 7 |
